# Supplementary material for: Selective Disruption of Mitochondrial Thiol Redox State in Cells and In Vivo
Source: PubMed Central journal article supplement — Cell Chem Biol. 2019 Mar 21;26(3):449–461.e8. doi: 10.1016/j.chembiol.2018.12.002 (PMC6436940; doi:10.1016/j.chembiol.2018.12.002), 2019-03-21
Supplement: mmc1.pdf [file mmc1.pdf]

**Cell Chemical Biology, Volume 26**

**Supplemental Information**

**Selective Disruption of Mitochondrial**

**Thiol Redox State in Cells and *In Vivo***

**Lee M. Booty, Justyna M. Gawel, Filip Cvetko, Stuart T. Caldwell, Andrew R. Hall, John F. Mulvey, Andrew M. James, Elizabeth C. Hinchy, Tracy A. Prime, Sabine Arndt, Cristiane Beninca, Thomas P. Bright, Menna R. Clatworthy, John R. Ferdinand, Hiran A. Prag, Angela Logan, Julien Prudent, Thomas Krieg, Richard C. Hartley, and Michael P. Murphy**

## Supplemental Information

### Selective Disruption of Mitochondrial Thiol Redox State in Cells and *In Vivo*

Lee M Booty<sup>1,#</sup>, Justyna M Gawel<sup>2,#</sup>, Filip Cvetko<sup>1</sup>, Stuart T Caldwell<sup>2</sup>, Andrew R Hall<sup>1</sup>, John F Mulvey<sup>3</sup>, Andrew M James<sup>1</sup>, Elizabeth C Hinchy<sup>1</sup>, Tracy A Prime<sup>1</sup>, Sabine Arndt<sup>1</sup>, Cristiane Beninca<sup>1</sup>, Thomas P Bright<sup>1</sup>, Menna R Clatworthy<sup>3</sup>, John R Ferdinand<sup>3</sup>, Hiran A Prag<sup>1</sup>, Angela Logan<sup>1</sup>, Julien Prudent<sup>1</sup>, Thomas Krieg<sup>3</sup>, Richard C Hartley<sup>2,\*</sup> & Michael P Murphy<sup>1,\*</sup>

<sup>1</sup>MRC Mitochondrial Biology Unit, University of Cambridge, Cambridge Biomedical Campus, CB2 0XY, UK

<sup>2</sup>School of Chemistry, University of Glasgow, Glasgow, G12 8QQ, UK

<sup>3</sup>Department of Medicine, University of Cambridge, Cambridge, CB2 0QQ, UK

#These authors contributed equally to this work

\*Correspondence: Michael P. Murphy ([mpm@mrc-mbu.cam.ac.uk](mailto:mpm@mrc-mbu.cam.ac.uk)) and Richard C. Hartley ([Richard.Hartley@glasgow.ac.uk](mailto:Richard.Hartley@glasgow.ac.uk)).

Figure S1

**a**

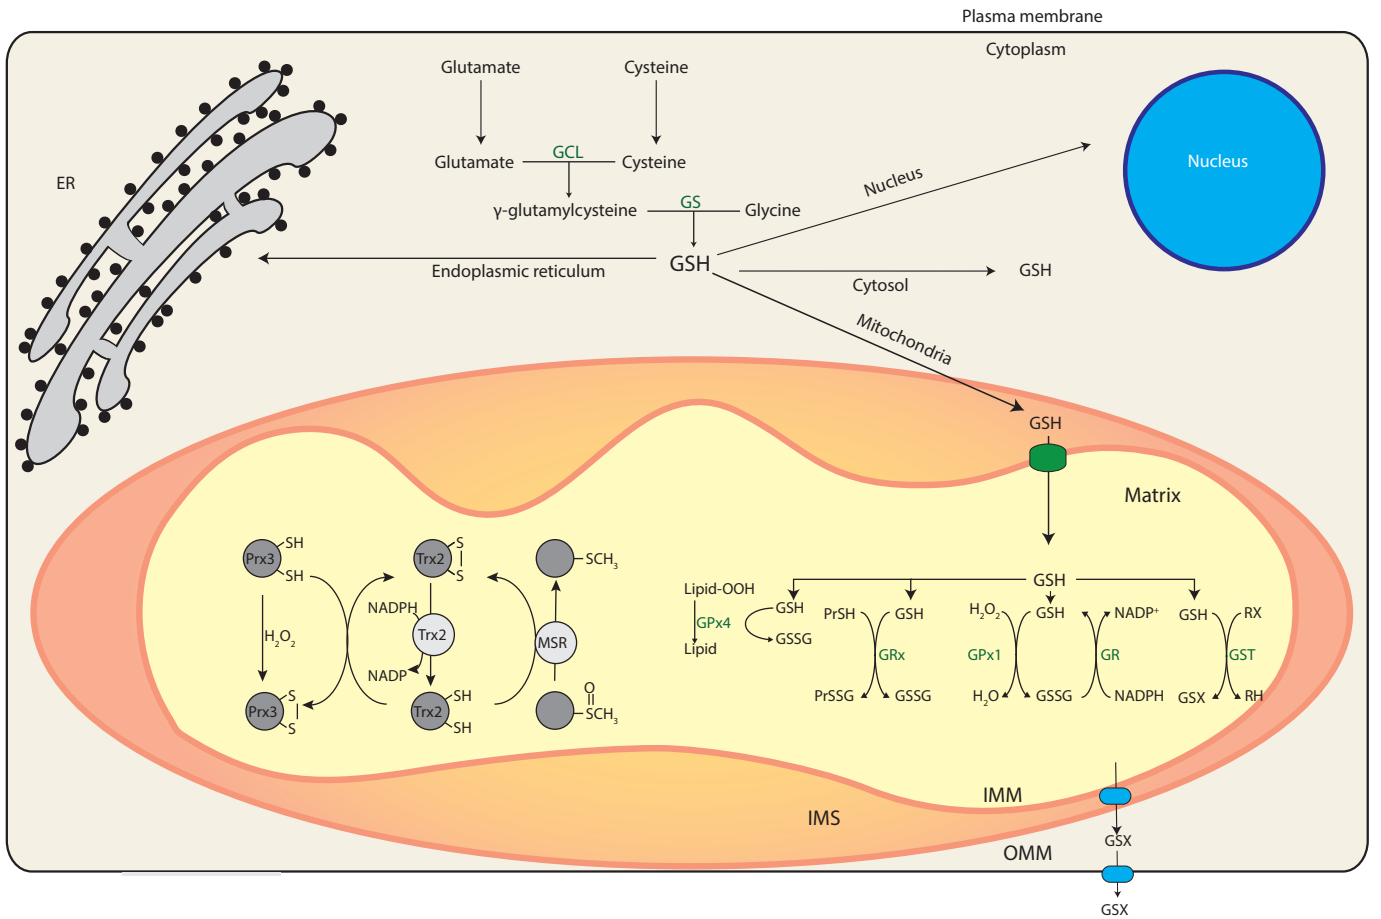

**b**

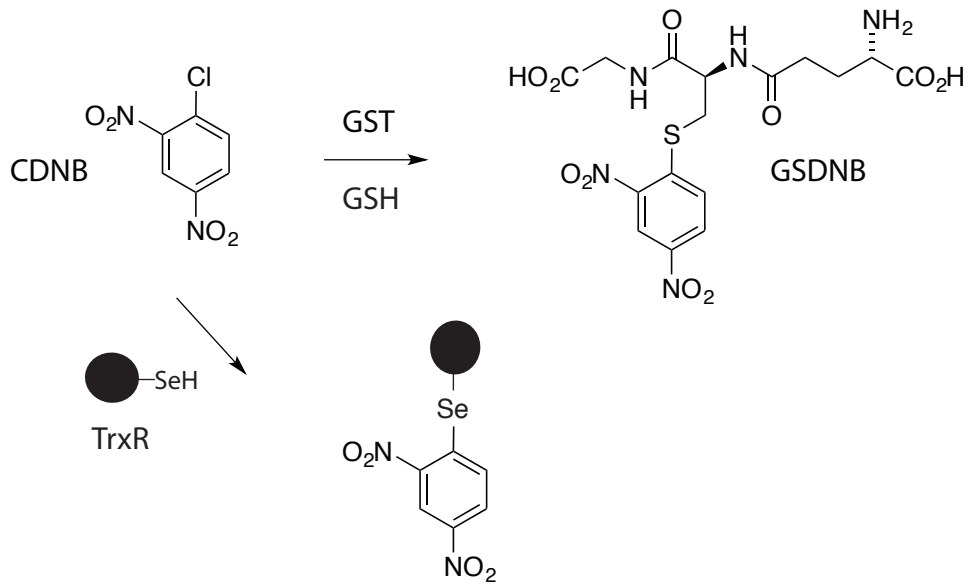

**Figure S1. Mitochondrial GSH and Trx systems (Related to Figure 1)**

Mitochondrial thiol redox homeostasis. **(a)** Glutathione (GSH) is synthesised in the cytosol and is then slowly transported into mitochondria. Within mitochondria GSH degrades  $H_2O_2$  and other peroxides by glutathione peroxidases (GPXs) 1 and 4 and the glutathione disulfide (GSSG) generated is recycled by glutathione reductase (GR), driven by the mitochondrial NADPH pool. GSH also recycles oxidised protein thiols in conjunction with glutaredoxin 2 (Grx2) and detoxifies electrophiles and xenobiotics through glutathione S-transferases (GSTs), with the resulting GSH conjugates being exported from mitochondria by ABC transporters. Thioredoxin-2 (Trx2) is a small dithiol protein that maintains other protein dithiols reduced. Doing so converts  $Trx2(-SH)_2$  to its disulfide ( $Trx2-SS$ ) which is then reduced back to  $Trx2(-SH)_2$  by thioredoxin reductase 2 (TrxR2) driven by the mitochondrial NADPH pool. Trx2 also provides electrons to peroxiredoxin 3 (Prx3) to degrade  $H_2O_2$  and to methionine sulfoxide reductases (Msr) to reverse methionine oxidation. **(b)** Reaction of CDNB with GSH catalysed by GSTs to form 1-*S*-glutathionyl-2,4-dinitrobenzene (GSDNB) and with the active site selenol of TrxR. OMM; outer mitochondrial membrane. IMM; inner mitochondrial membrane. IMS; intermembrane space.  $\gamma$ GCL; glutamate cysteine ligase. GS; glutathione synthetase.

Figure S2

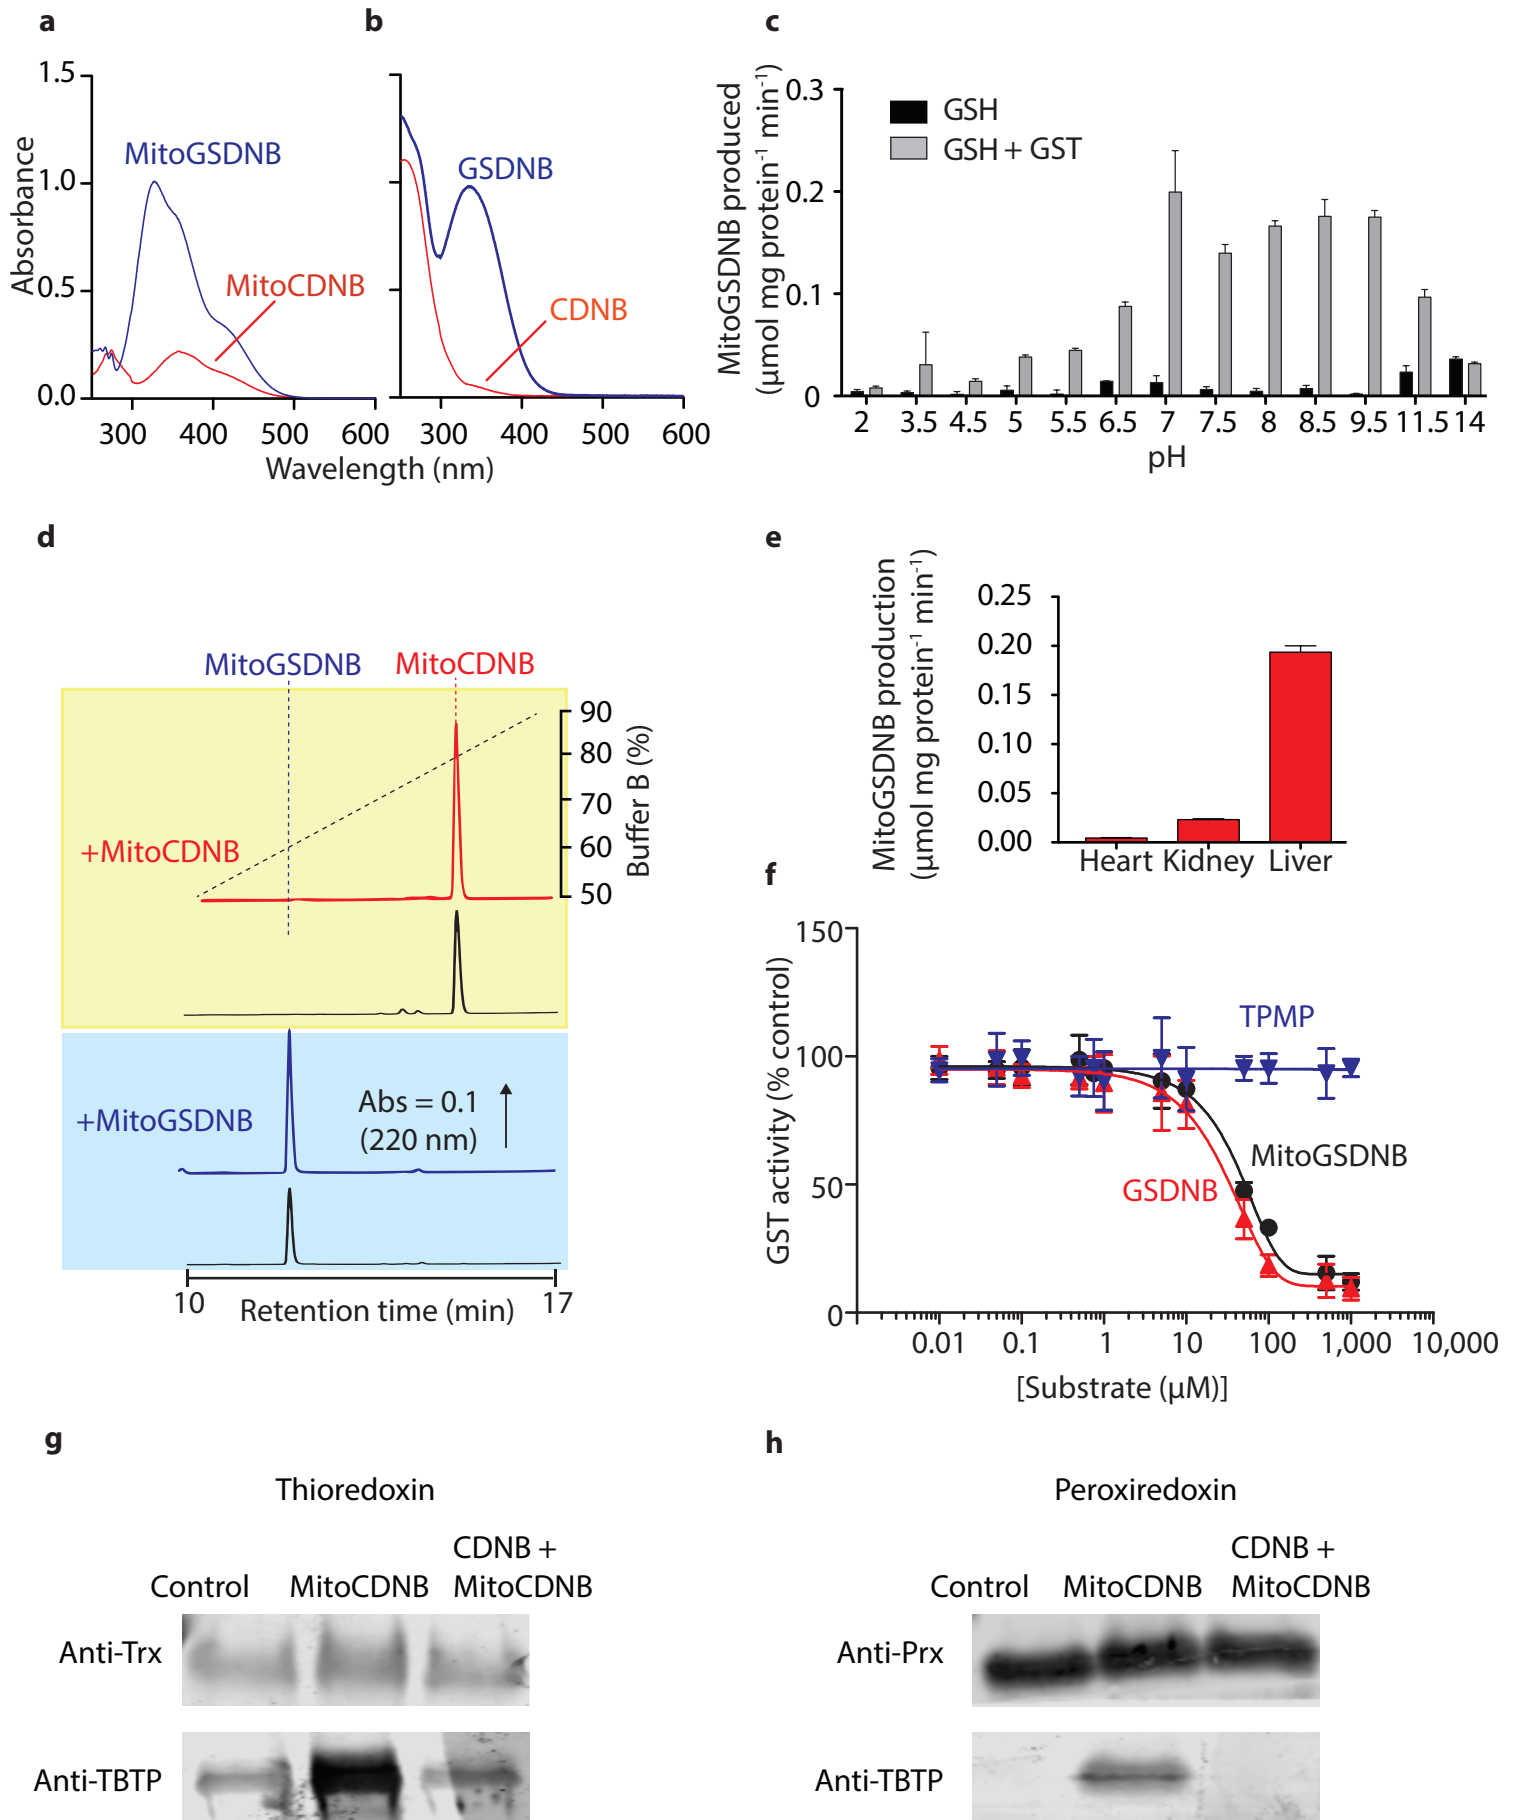

**Figure S2. Reactivity of MitoCDNB (Related to Figure 2)**

Reactivity of MitoCDNB. **(a)** UV-Vis spectra of 100  $\mu$ M MitoCDNB (red) or MitoGSDNB (blue) in KCl buffer. **(b)** UV-Vis spectra of 100  $\mu$ M CDNB (red) or GSDNB (blue) in KCl buffer. **(c)** pH dependence of MitoCDNB reactivity with GSH. MitoCDNB (10  $\mu$ M) and GSH (1 mM) were incubated at different pH values at 37 °C without (black), or with GST- $\kappa$  (100  $\mu$ g; grey) and MitoGSDNB production measured at 328 nm over 30 min. **(d)** RP-HPLC identification of MitoGSDNB. Samples from Figure 2b (black lines) were spiked with 20 nmol MitoCDNB (red) or MitoGSDNB (blue) and re-analysed by RP-HPLC. **(e)** MitoCDNB transformation by GST in different tissues. Mitochondrial matrix fractions (100  $\mu$ g protein) from rat liver, kidney or heart were incubated with GSH and MitoCDNB as in (c) and MitoGSDNB production calculated. Data are means  $\pm$  S.E.M, N = 3. **(f)** Inhibition of GST by GSDNB (red), MitoGSDNB (black) and TPP (blue) assessed by measuring GST (100  $\mu$ g)-mediated conjugation of GSH (1 mM) to acrolein (1 mM) in PBS in the presence of increasing concentrations of compounds. The activity of GST in the absence of other compounds was  $6.84 \pm 0.6$   $\mu$ mol acrolein-GSH/min/mg protein (mean  $\pm$  S.E.M, n = 3). **(g, h)** Alkylation of Trx1 **(g)** and Prx1 **(h)** by MitoCDNB. Trx1 (20  $\mu$ g) or Prx1 (20  $\mu$ g) was incubated with 20  $\mu$ M MitoCDNB (MitoCDNB), 20  $\mu$ M CDNB for 5 min at RT followed by 20  $\mu$ M MitoCDNB for 10 min at RT (CDNB + MitoCDNB) or 0.1 % EtOH in PBS (control) for 10 min at RT. The protein was then analysed by western blotting with anti-Trx1 or anti-Prx1 antibodies and then reprobed with anti-TPP antiserum.

Figure S3

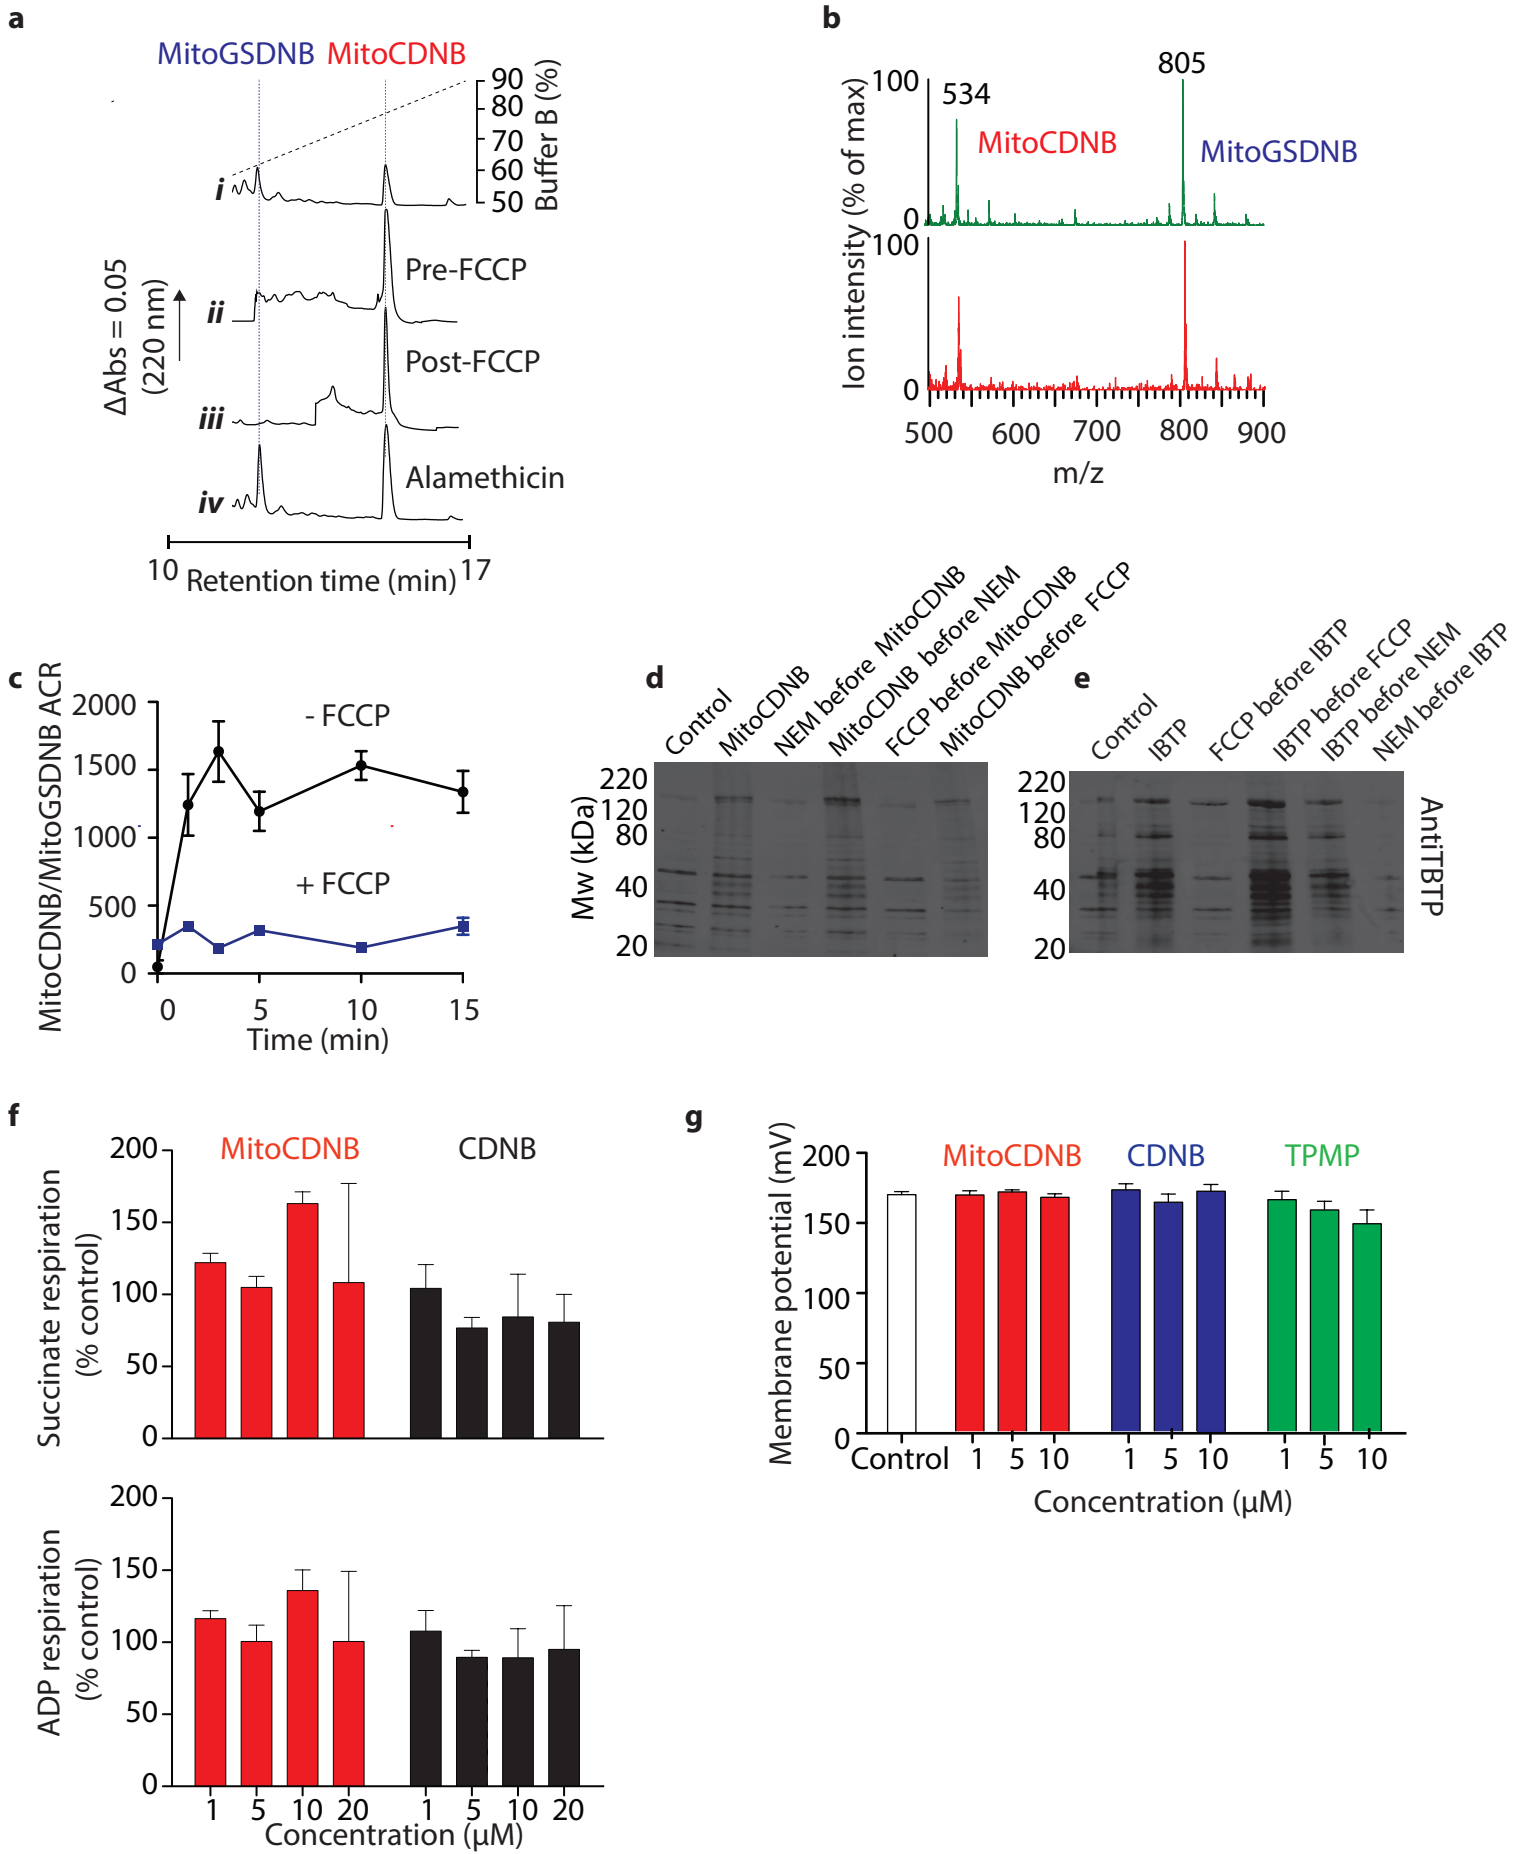

**Figure S3. Interactions of MitoCDNB with mitochondria (Related to Figures 2 and 3)**

(a) Analysis of mitochondrial supernatants following incubation with MitoCDNB. Rat liver mitochondria were incubated as described in Figure 2h, and the supernatants analysed by RP-HPLC. (b) Mass spectrometric analysis of MitoCDNB reaction products within mitochondria. Mitochondria were incubated with 10  $\mu$ M MitoCDNB for 5 min, pelleted by centrifugation and then extracted and analysed by mass spectrometry. The upper trace shows all m/z values detected while the lower trace is a scan of precursors that generate an m/z of 183 upon fragmentation. (c) Accumulation ratio (ACR) for MitoCDNB in mitochondria. Mitochondria were incubated with MitoCDNB  $\pm$  FCCP, then pelleted and the MitoCDNB in the supernatant and pellets analysed by RP-HPLC and used to calculate the ACR assuming a mitochondrial volume of 0.6  $\mu$ l/mg protein. (d, e) Binding of MitoCDNB and IBTP to mitochondrial proteins. MitoCDNB (d, 10  $\mu$ M) or IBTP (e, 10  $\mu$ M) was incubated with rat liver mitochondria (1 mg protein/mL) for 5 min with further addition of 1 mM NEM or 2  $\mu$ M FCCP before or after MitoCDNB/IBTP. Mitochondria were then pelleted by centrifugation, and analysed by Western blotting using an anti-TPP antiserum. (f) Acute effects of MitoCDNB on mitochondrial respiration. Respiration by rat liver mitochondria (1 mg protein/mL) was determined as a percentage of vehicle control after addition of succinate (10 mM, top) and 2 mins later after addition of ADP (75  $\mu$ M, bottom). The respiration rates for control incubations were 140.2  $\pm$  9.2 (ADP rate) and 229.3  $\pm$  13.2 (succinate rate) pmol/s/mg protein. (g) Acute effects of MitoCDNB on mitochondrial membrane potential. Rat liver mitochondria (1 mg protein/ml) were incubated with [<sup>3</sup>H]-TPMP with MitoCDNB, MitoGSDNB or TPMP. Mitochondria were pelleted and both pellets and supernatants assessed for radiolabel content and the membrane potential calculated. All data are means  $\pm$  S.E.M of N = 3.



Figure S4

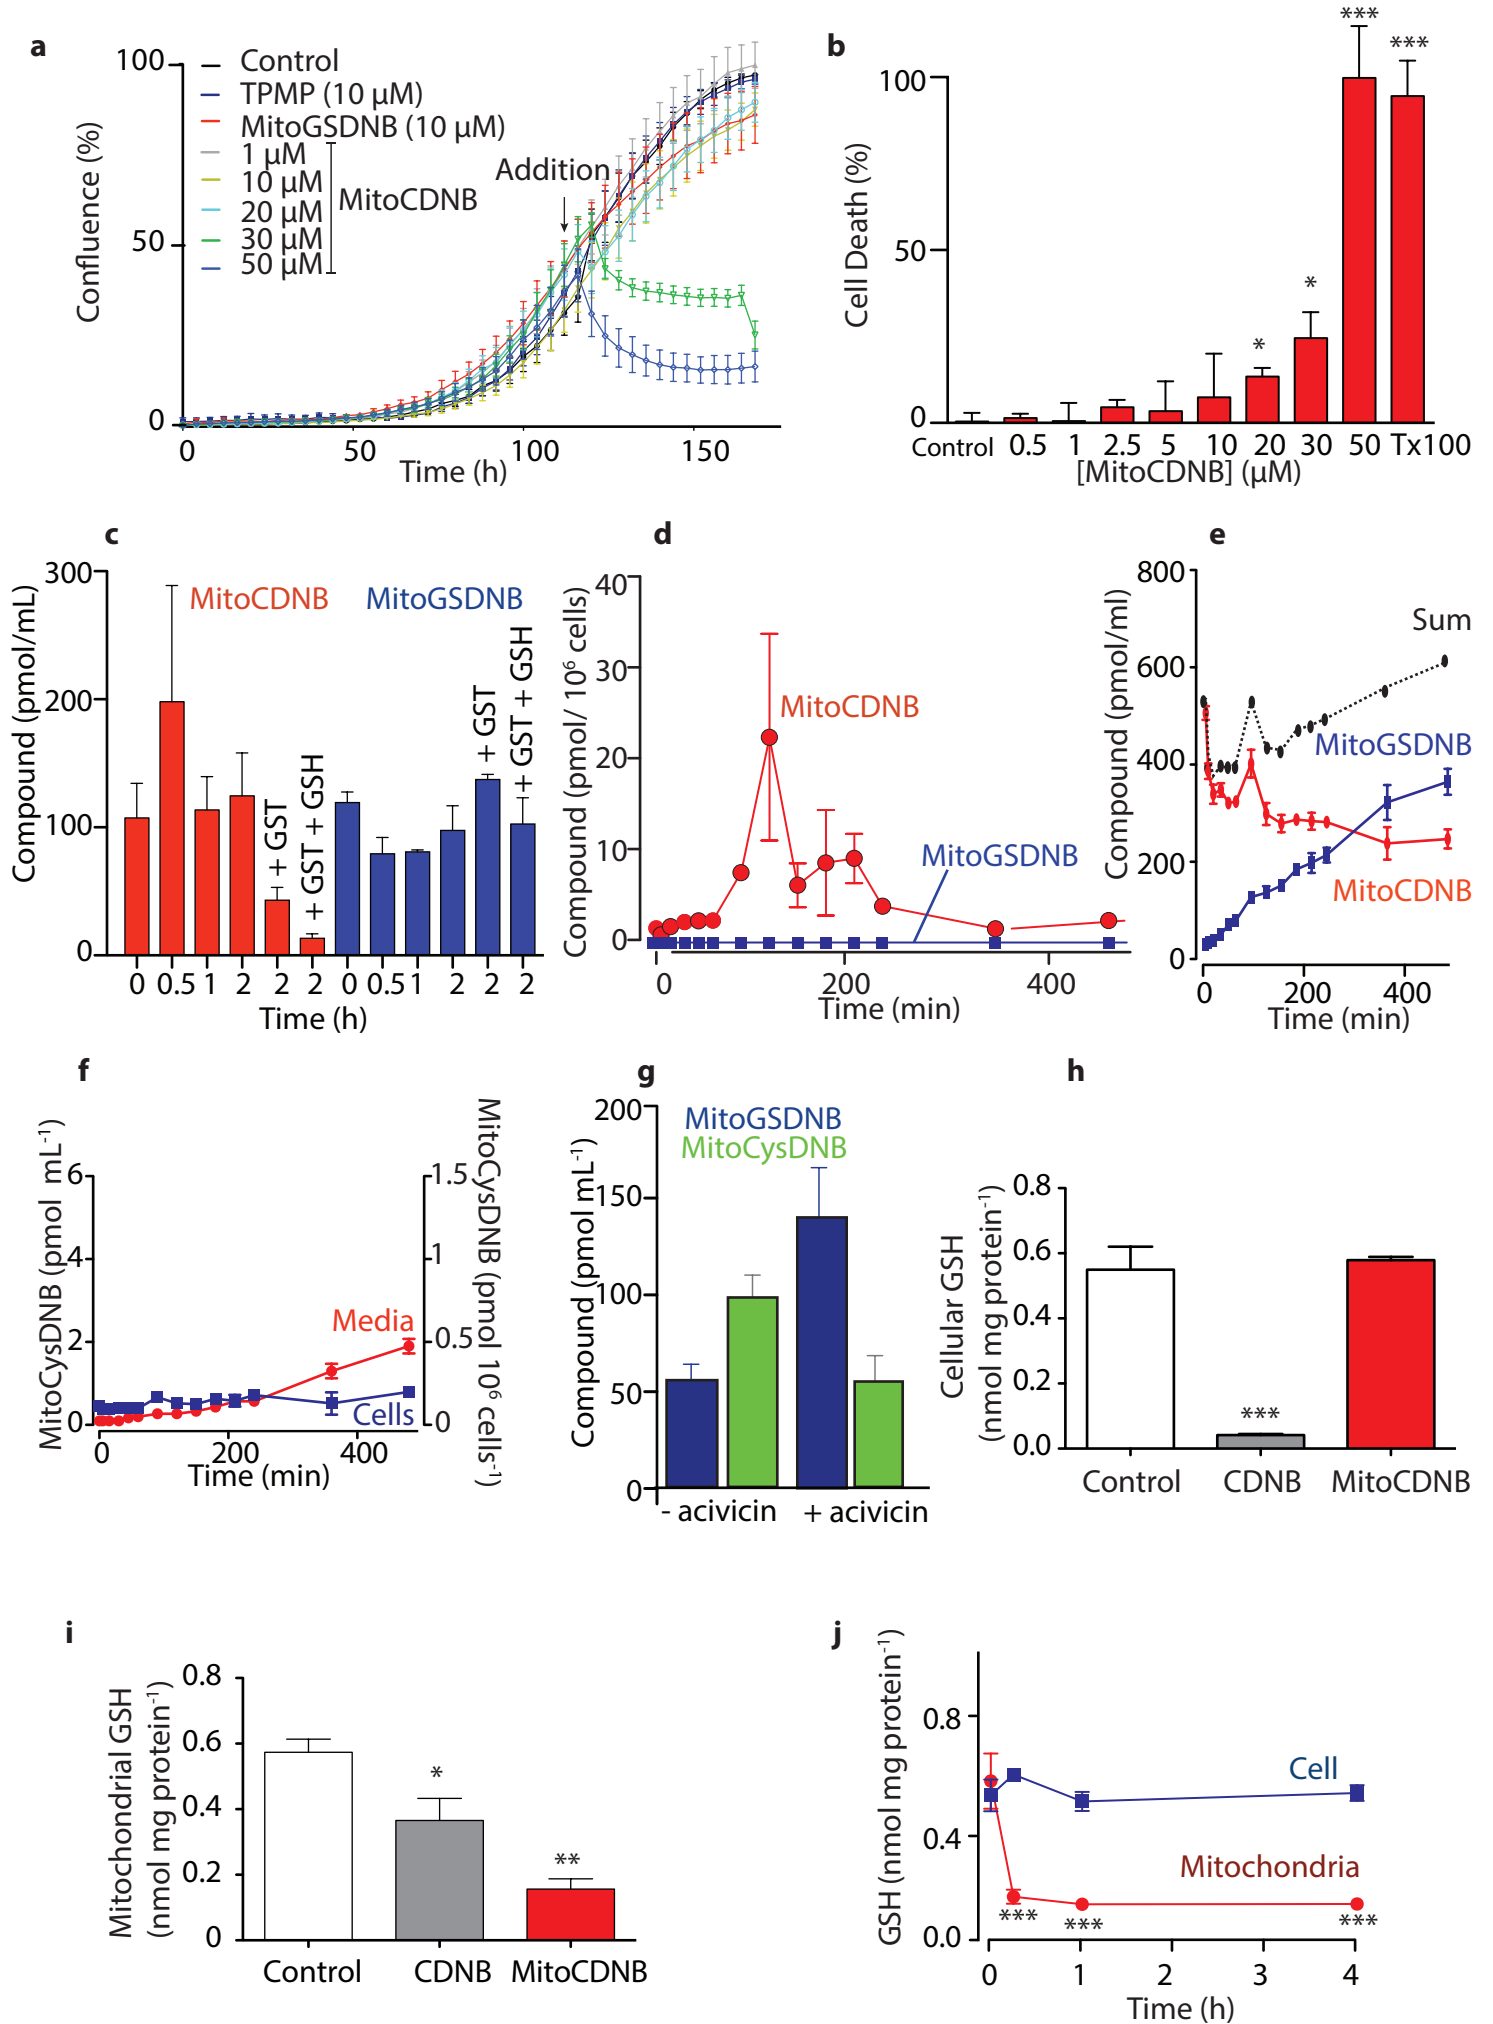

**Figure S4. Metabolism of MitoCDNB by cells (Related to Figures 3 and 4)**

(a) Effect of MitoCDNB on C2C12 cell growth was analysed using an Incucyte system. Data are means  $\pm$  S.E.M, N= 4 biological replicates, with each biological replicate condition repeated eight times. (b) Effect of MitoCDNB on HepG2 cell viability. Cells were incubated with MitoCDNB for 10 min before addition of propidium iodide (1 mg/ml) and were then analysed using flow cytometry. Cell death was compared to vehicle controls (0.1 % EtOH) and 100 % cell death was generated with 5 % (v/v) Triton-X100 (Tx100). (c) Stability of MitoCDNB and MitoGSDNB in culture medium. MitoCDNB (1  $\mu$ M) or MitoGSDNB (1  $\mu$ M) were incubated in 1 mL DMEM supplemented with 10 % FBS, with further additions of GSH (10 mM), or GSH and 100  $\mu$ g GST- $\kappa$  where indicated. MitoCDNB metabolites were then quantified by LC-MS/MS. (d, e) Uptake and metabolism of MitoCDNB by C2C12 cells. C2C12 cells were incubated with 10  $\mu$ M MitoCDNB, then the cells and the culture medium were analysed by LC-MS/MS to determine the MitoCDNB and MitoGSDNB levels and the sum of MitoCDNB and MitoGSDNB. (f) Generation of MitoCysDNB by C2C12 cells. MitoCDNB (10  $\mu$ M) was incubated with C2C12 cells as described in d and e, above. Cells and media were then extracted, analysed by LC-MS/MS and levels of MitoCysDNB quantified. (g) Breakdown of MitoGSDNB by GGT. HepG2 cells were incubated in 1 mL DMEM + 10 % FBS  $\pm$  acivicin (500  $\mu$ M) for 30 min. MitoGSDNB (1  $\mu$ M) was then added and media assessed for presence of MitoCysDNB or MitoGSDNB by LC-MS/MS after 120 min. (h) GSH depletion in cells by MitoCDNB. C2C12 cells were incubated for 1 h with MitoCDNB (10  $\mu$ M), CDNB (10  $\mu$ M) or vehicle (0.1 % EtOH) and then isolated and total GSH levels measured. (i) Depletion of mitochondrial GSH in cells by MitoCDNB. C2C12 cells were incubated as in (h), mitochondria were isolated and GSH levels measured. (j) Time course of GSH depletion by MitoCDNB. C2C12 cells were incubated with MitoCDNB (10  $\mu$ M) or vehicle (0.1 % EtOH) and at the indicated times either total cellular or mitochondrial GSH was measured. Data are means  $\pm$  S.E.M. N = 3-4. \*\*\*p < 0.001, \*p < 0.05, \*\*p < 0.01 relative to control, or time = 0 (j).

Figure S5

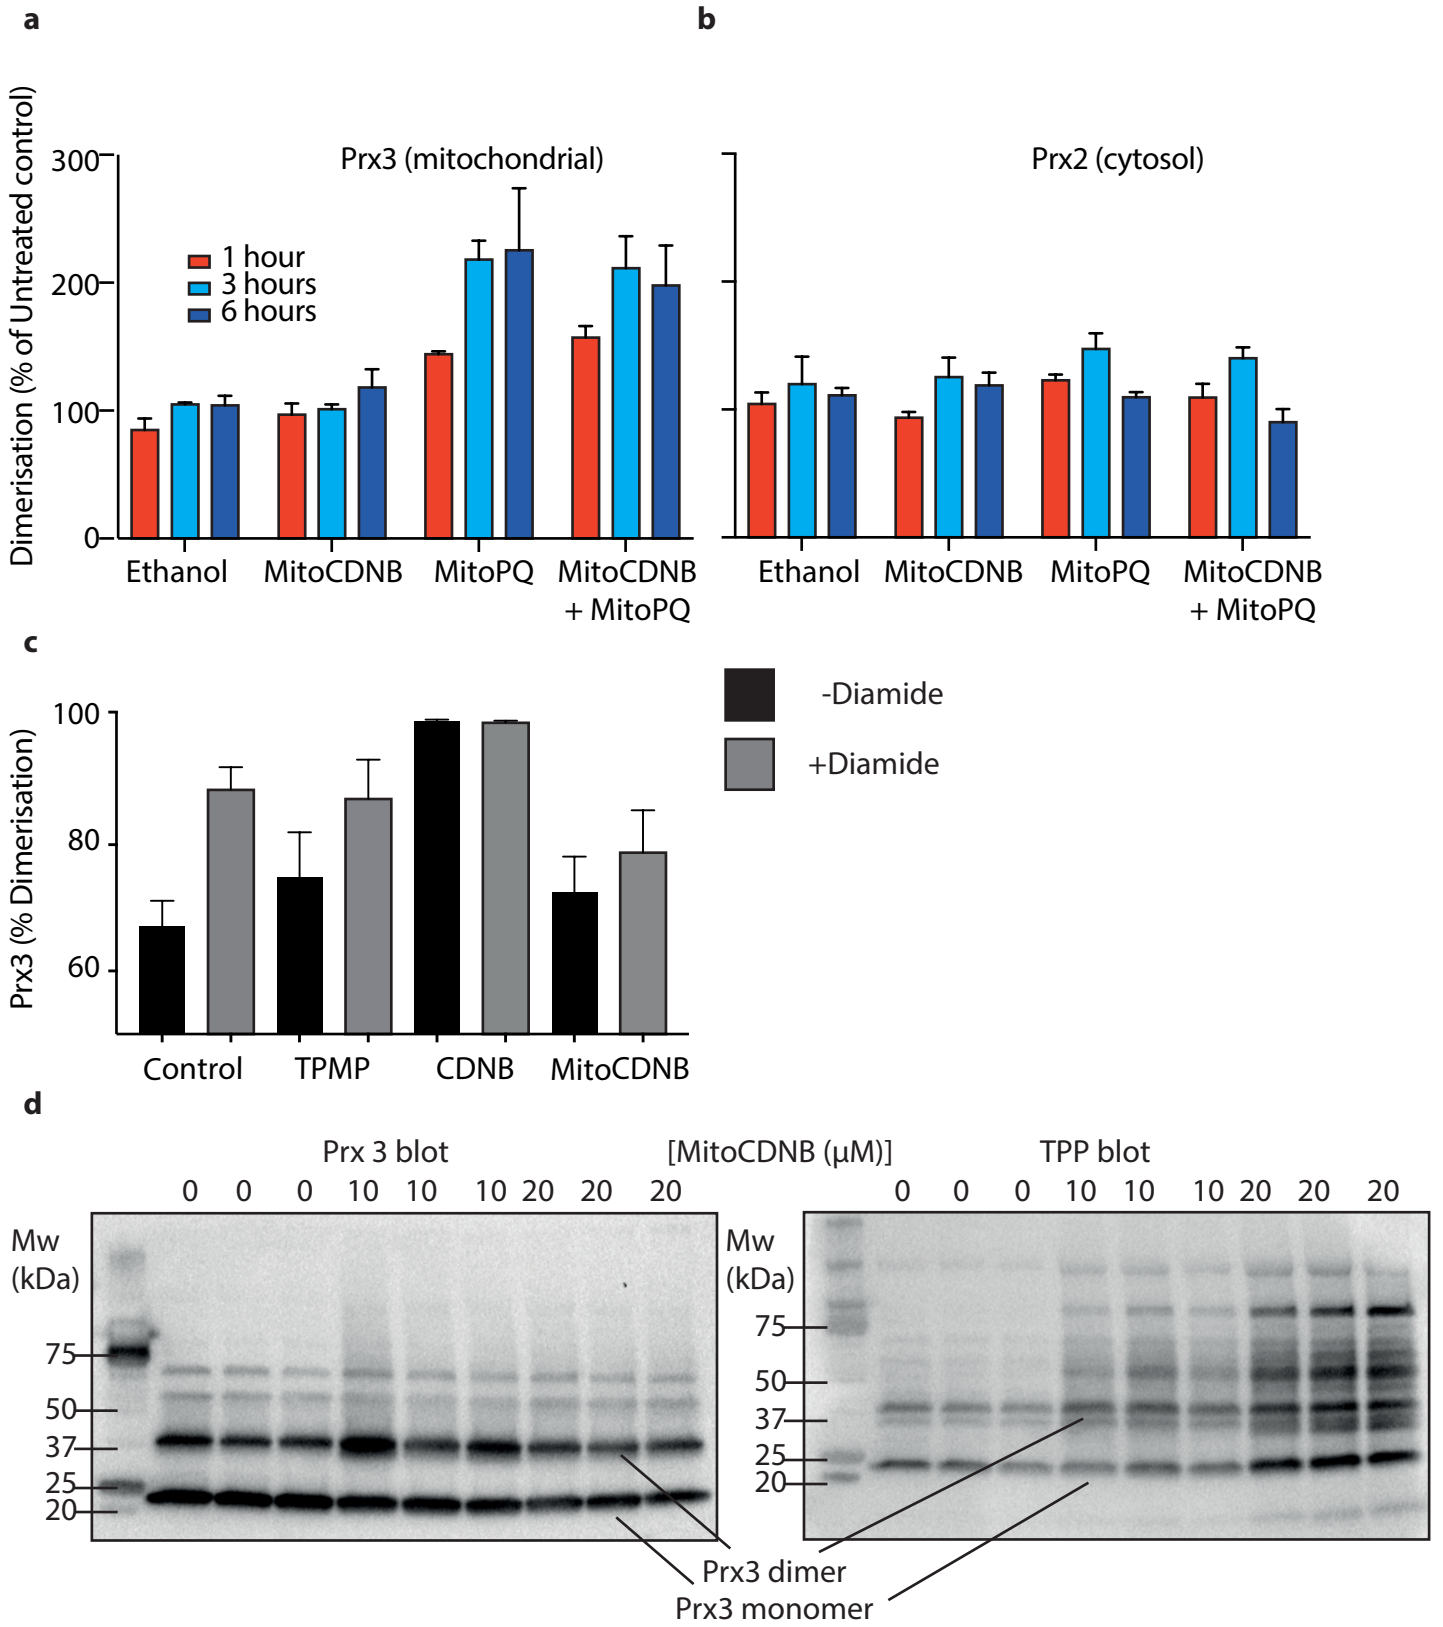

**Figure S5. Effect of MitoCDNB on peroxiredoxin dimerization (Related to Figure 4)**

(a) Effect of C2C12 cells were treated with MitoPQ (5  $\mu$ M), MitoCDNB (10  $\mu$ M), both together, or an EtOH carrier control and then assessed for dimerization of Prx2 (a) and Prx3 (b). Means  $\pm$  SEM n = 3. (c) Effect of diamide on Prx3 dimerization. C2C12 cells were treated with 5  $\mu$ M MitoCDNB, CDNB or TPMP plus an EtOH control for 1 h then further incubated for 10 min  $\pm$  250  $\mu$ M diamide and Prx3 dimerisation assessed. (d) Western blotting of Prx3 and MitoCDNB. Rat liver mitochondria (1 mg protein/ml) were incubated with rotenone and succinate, and various concentrations of MitoCDNB for 30 min at 37°C. Then mitochondria were pelleted and 50  $\mu$ g protein was separated by SDS-PAGE and analysed by western blot using an anti-Prx3 antibody (1:500) and then re-probed using anti-TPP antiserum (1:1,000), and visualised by ECL.

Figure S6

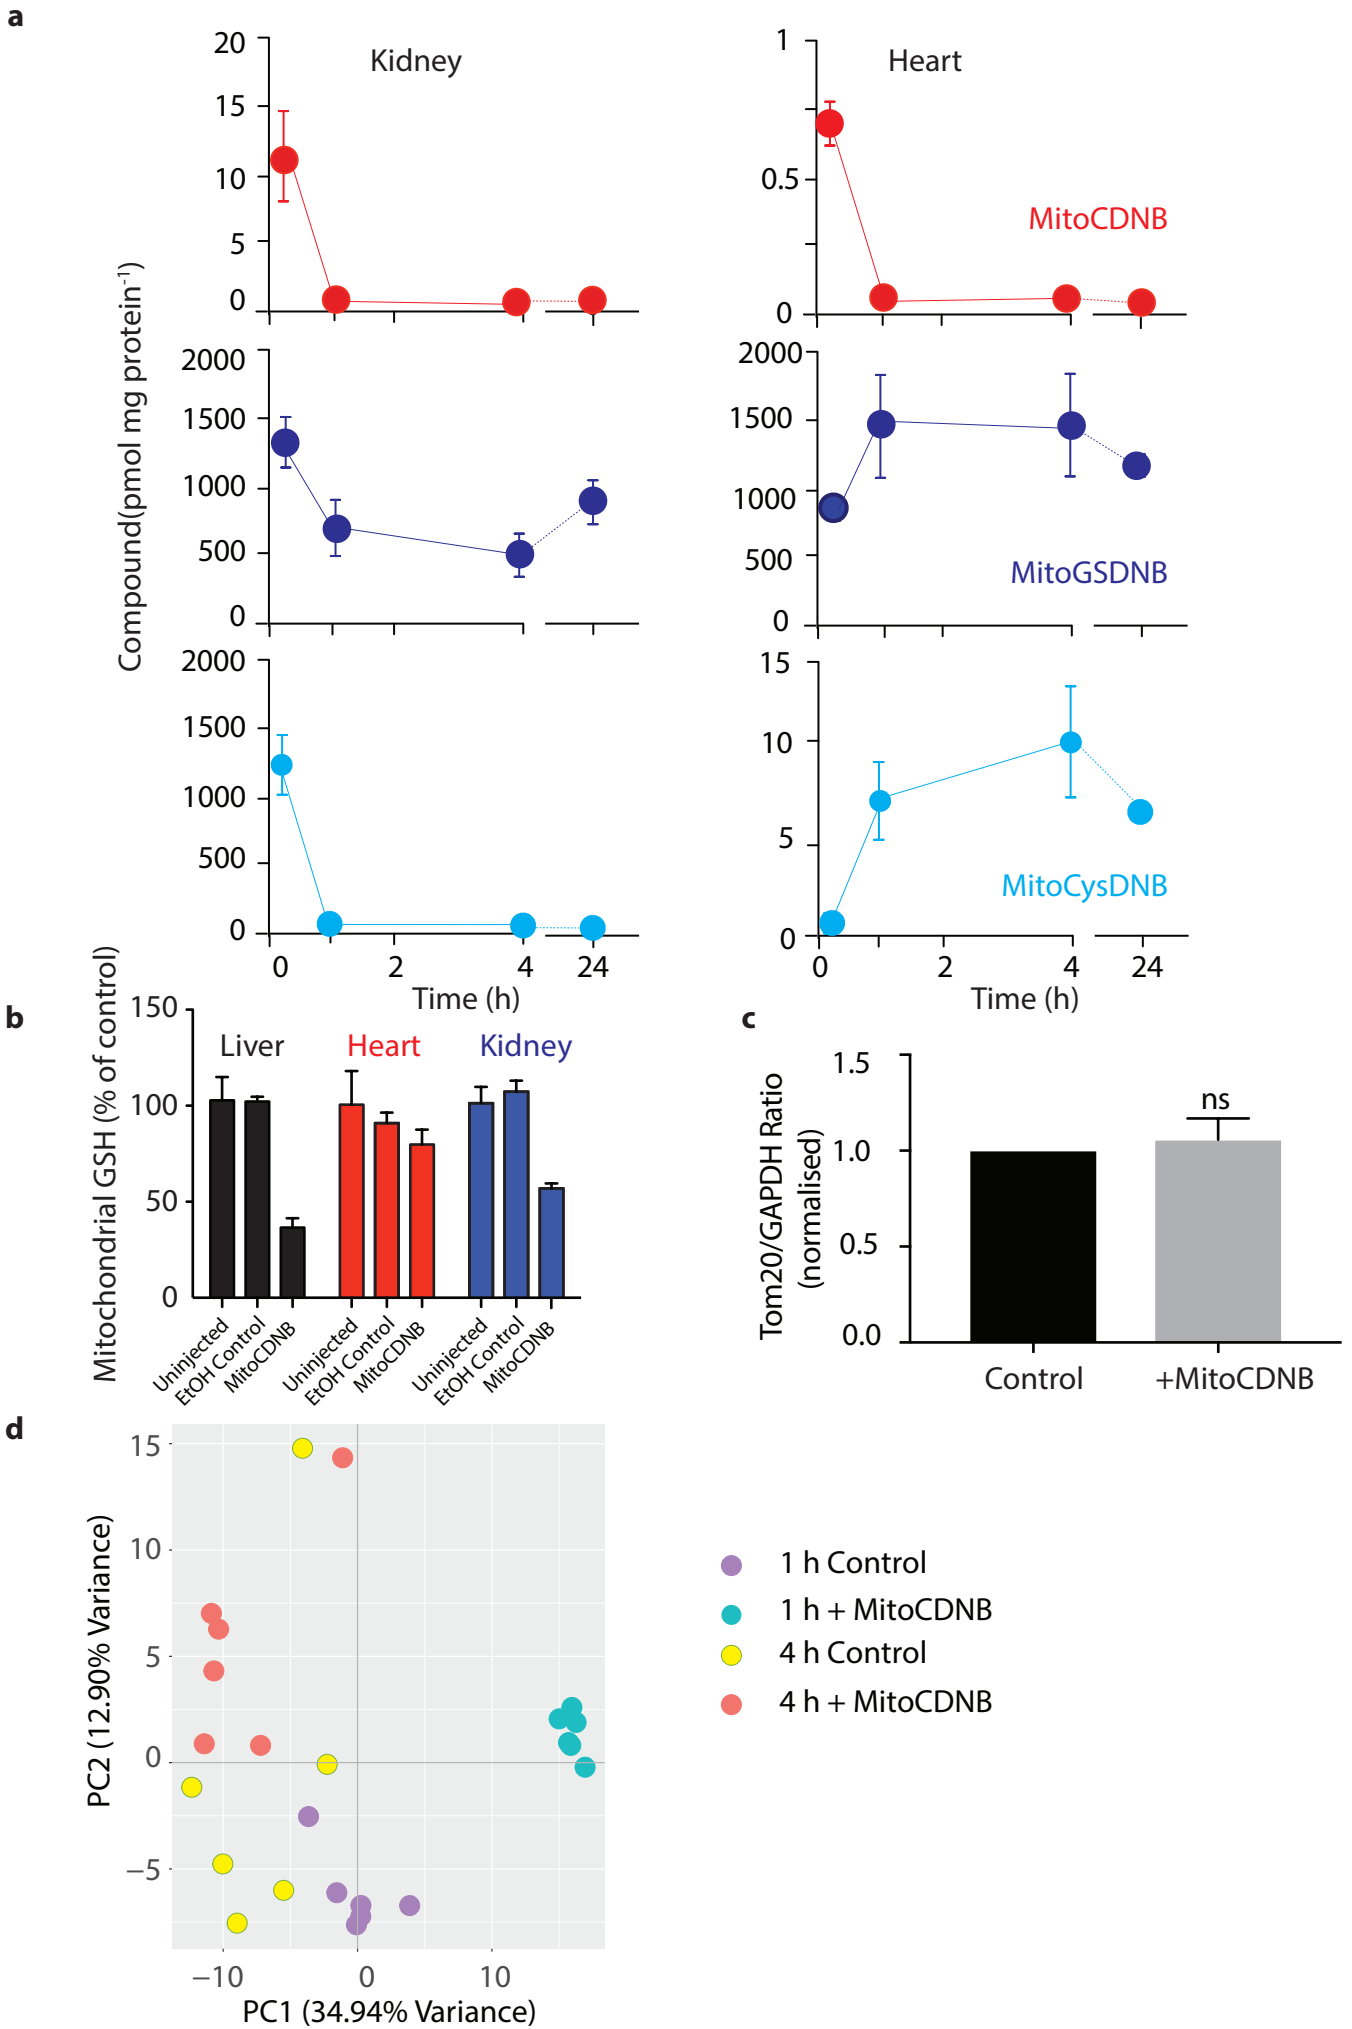

**Figure S6. Distribution and effects of MitoCDNB and its metabolites *in vivo* and in cells (Related to Figures 5 and 6)**

(a) Mice were injected with MitoCDNB (5 mg/kg) and at the indicated times whole kidney or heart tissue were extracted and levels of MitoCDNB, MitoGSDNB and MitoCysDNB quantified by LC-MS/MS. (b) Comparison of mitochondrial GSH levels in liver, heart and kidney mitochondria isolated from mice that received no injection, or 24 h after injection of vehicle (5 % EtOH) or MitoCDNB (5 mg/kg). Data are means  $\pm$  SEM, N = 4. The absolute levels of GSH in the mitochondria from the control tissues were: liver =  $3.71 \pm 0.6$ ; kidney  $2.14 \pm 0.52$ ; heart  $2.36 \pm 0.1$  (nmol GSH/mg protein). (c) Effect of MitoCDNB on mitochondrial content. C2C12 cells were incubated  $\pm 10 \mu\text{M}$  MitoCDNB for 4 h and then analysed by western blotting for content of GAPDH and TOM20, which were quantified by Image Studio Lite. The ratio of TOM20 to GAPDH determined and the value in the MitoCDNB sample was normalised to that of the control. Data are means  $\pm$  SEM of 3 separate incubations. (d) Principal component analysis of effect of MitoCDNB on RNA expression levels. Mice (n = 6 in each condition) were administered MitoCDNB (5 mg/kg) or carrier by tail vein injection and then the liver was isolated 1 and 4 h after injection and the transcriptomes analysed by RNA seq and subjected to principal component analysis using the top 500 most variably expressed genes.
